# Supplementary material for: Antibody response of a particle-inducing, liposome vaccine adjuvant admixed with a Pfs230 fragment
Source: PubMed Central journal article supplement (PMC7080793; doi:10.1038/s41541-020-0173-x), 2020-03-18
Supplement: 41541_2020_173_MOESM1_ESM.pdf [file 41541_2020_173_MOESM1_ESM.pdf]

## Supporting Information: Antibody Response of a Particle-Inducing, Liposome Vaccine Adjuvant Admixed with a Pfs230 Fragment

Wei-Chiao Huang, Bingbing Deng, Amal Seffouh, Joaquin Ortega, Carole Long, Ragavan V. Suresh, Xuedan He, Kazutoyo Miura, Shwu-Maan Lee, Yimin Wu, Jonathan F. Lovell

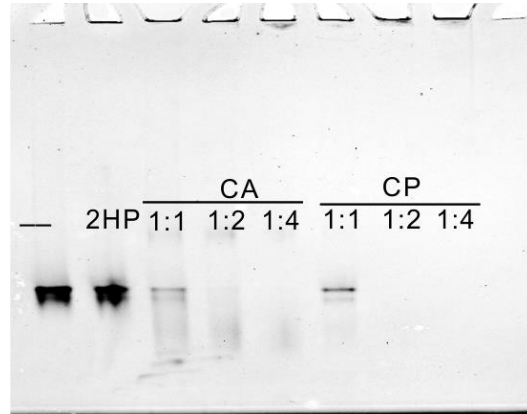

**Supplement Figure 1.** Native PAGE of Pfs230C1 after 1 hr incubation with indicated liposomes. Under native conditions, the protein is separated based on not only their size, but also their charge. No molecular weight marker is included.

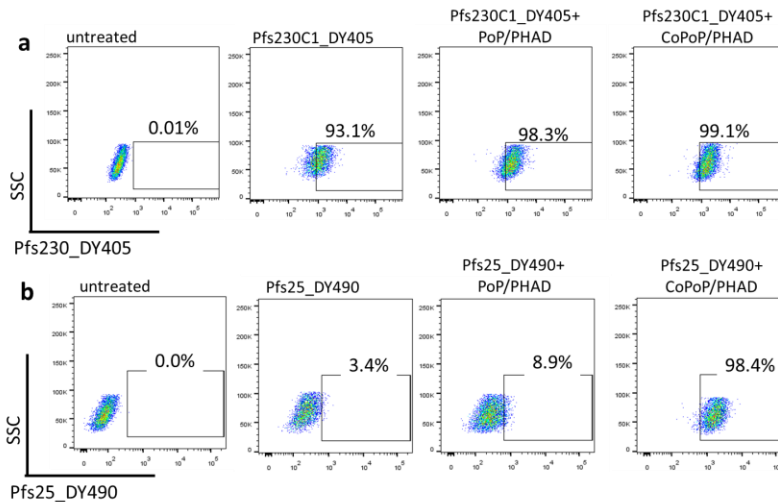

**Supplement Figure 2.** Gating for RAW264.7 macrophages for fluorophore-labeled antigen uptake. **a**, Pfs230C1 and **b**, Pfs25 were admixed with CoPoP/PHAD, PoP/PHAD or PBS. The antigen positive cells were gated compared to untreated cells, from n=3 independent experiments.

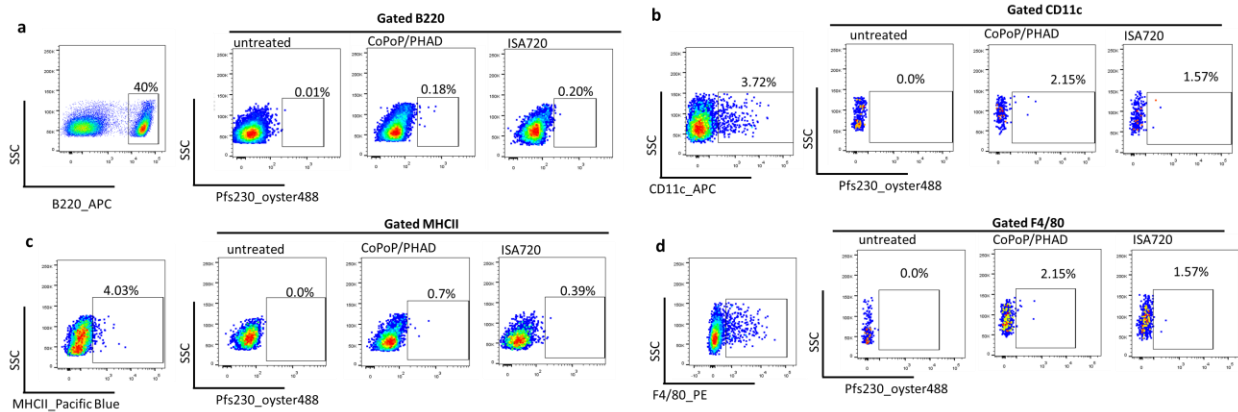

**Supplement Figure 3. Gating for APC cells uptake of fluorophore-labeled Pfs230C1 in draining lymph nodes.** Cells were first gated by SSC-FSC then **a**, B220, **b**, CD11c, **c**, MHCII and **d**, F4/80 positive cells were gated compared to unstained cells. Pfs230-positive cells were gated with Oyster488-labeled Pfs230C1. Representative plots are shown from biologically independent experiments with n=3 mice.

### Supporting Tables of SMFA results

Each SMFA test group (i.e. each table entry) was assessed with n=20 mosquitos per group. Table entries indicate the sample dose used for immunization. Statistical testing is based on a zero-inflated negative binomial random effects model that has been described previously (Miura et al. Vaccine. 2016;34:4145-51).

**Supplementary Table 1. Summary of ELISA data**

| Sample condition |             |                  | Day | Serum         | Purified IgGs |          |              |                  | SMFA  |                  |       |         |      |                     |
|------------------|-------------|------------------|-----|---------------|---------------|----------|--------------|------------------|-------|------------------|-------|---------|------|---------------------|
| Study #          | Adjuvant    | Pfs230 dose [ng] | Day | Geo Mean [EU] | Conc [mg/mL]  | Total EU | IgG2/1 Ratio | Avidity IC50 [M] | SMFA# | Test IgG [ug/mL] | % TRA | p-value | LMR  | EU in feeder [SQRT] |
| MA0068-1         | CoPoP/ PHAD | 1000             | 42  | 47,879        | 4             | 87,670   | 4.68         | 4.43             | 182-1 | 750              | 99.1  | 0.001   | 2.04 | 128.21              |
|                  | CoPoP/ PHAD | 100              | 42  | 4,085         | 4             | 15,381   | 3.85         | 4.27             | 182-1 | 750              | 84.4  | 0.001   | 0.81 | 53.70               |
|                  | CoPoP/ PHAD | 10               | 42  | 19,775        | 4             | 43,879   | 5.42         | 3.86             | 182-1 | 750              | 99.1  | 0.001   | 2.04 | 90.70               |
|                  | CoPoP alone | 1000             | 42  | 15,986        | 4             | 35,831   | 0.77         | 4.01             | 182-1 | 750              | 49.5  | 0.116   | 0.30 | 81.97               |
|                  | PoP/ PHAD   | 1000             | 42  | 30,399        | 4             | 59,717   | 2.68         | 3.25             | 182-1 | 750              | 63.3  | 0.012   | 0.44 | 105.82              |
|                  | Alum        | 1000             | 42  | 26,471        | 4             | 66,893   | 0.57         | 4.60             | 182-1 | 750              | 79.8  | 0.001   | 0.70 | 111.99              |
|                  | ISA720      | 1000             | 42  | 156,547       | 4             | 211,271  | 2.92         | 4.38             | 182-1 | 750              | 100.0 | 0.001   | Inf* | 199.03              |
| MA0068-2         | CoPoP/ PHAD | 125              | 42  | 30,294        | 4             | 64,308   | 3.53         | 4.96             | 192-1 | 750              | 99.8  | 0.001   | 2.80 | 109.81              |
|                  | CoPoP/ PHAD | 10               | 42  | 14,335        | 4             | 26,446   | 3.90         | 4.62             | 192-1 | 750              | 93.2  | 0.001   | 1.17 | 70.42               |
|                  | CoPoP/ PHAD | 0.8              | 42  | 2,198         | 4             | 8,214    | 2.59         | 3.97             | 192-1 | 750              | 28.4  | 0.439   | 0.15 | 39.24               |
|                  | ISA720      | 125              | 42  | 74,222        | 4             | 96,923   | 4.87         | 4.70             | 192-1 | 750              | 100.0 | 0.001   | Inf* | 134.81              |
|                  | ISA720      | 10               | 42  | 30,201        | 4             | 68,528   | 6.60         | 4.33             | 192-1 | 750              | 100.0 | 0.001   | Inf* | 113.35              |

|                         |                |       |     |         |   |         |       |      |       |     |       |       |       |        |
|-------------------------|----------------|-------|-----|---------|---|---------|-------|------|-------|-----|-------|-------|-------|--------|
|                         | ISA720         | 0.8   | 42  | 84      | 4 | 1,604   | 9.14  | 3.87 | 192-1 | 750 | 51.7  | 0.069 | 0.32  | 17.34  |
|                         | alum           | 125   | 42  | 29,265  | 4 | 72,396  | 0.85  | 4.31 | 192-1 | 750 | 92.3  | 0.001 | 1.11  | 116.51 |
| MA-0078-00              | ISA720         | 200   | 42  | 87,356  | 2 | 49,049  | 2.89  | 4.59 | 205-1 | 750 | 99.7  | 0.001 | 2.50  | 135.62 |
|                         | ISA720         | 40    | 42  | 28,917  | 2 | 27,803  | 4.85  | 4.28 | 205-1 | 750 | 100.0 | 0.001 | Inf * | 102.11 |
|                         | Alum           | 5000  | 42  | 43,314  | 2 | 34,698  | 0.87  | 4.82 | 205-1 | 750 | 60.7  | 0.019 | 0.41  | 114.07 |
|                         | Alum           | 1000  | 42  | 13,651  | 2 | 19,525  | 1.12  | 4.28 | 205-1 | 750 | 67.0  | 0.022 | 0.48  | 85.57  |
|                         | CoPoP/<br>PHAD | 50    | 42  | 17,297  | 2 | 17,413  | 4.33  | 5.95 | 205-1 | 750 | 91.1  | 0.001 | 1.05  | 80.81  |
|                         | CoPoP/<br>PHAD | 10.0  | 42  | 5,854   | 2 | 5,271   | 4.11  | 5.68 | 205-1 | 750 | 27.4  | 0.420 | 0.14  | 44.46  |
|                         | CoPoP/<br>PHAD | 2.0   | 42  | 2,481   | 2 | 4,589   | 3.17  | 6.85 | 205-1 | 750 | 23.5  | 0.484 | 0.12  | 41.48  |
| PC-067-00               | ISA720         | 200   | 42  | 80,172  | 2 | 66,874  | 1.93  | 4.36 | 205-1 | 750 | 98.8  | 0.001 | 1.91  | 158.36 |
|                         | ISA720         | 40    | 42  | 2,908   | 2 | 29,090  | 3.76  | 4.23 | 205-1 | 750 | 89.7  | 0.001 | 0.99  | 104.44 |
|                         | Alum           | 5000  | 42  | 28,854  | 2 | 28,368  | 0.54  | 4.51 | 205-1 | 750 | 54.2  | 0.061 | 0.34  | 103.14 |
|                         | Alum           | 1000  | 42  | 15,722  | 2 | 24,993  | 0.40  | 4.24 | 205-1 | 750 | 62.8  | 0.019 | 0.43  | 96.81  |
|                         | CoPoP/<br>PHAD | 50    | 42  | 15,584  | 2 | 16,153  | 3.96  | 5.19 | 205-1 | 750 | 63.8  | 0.018 | 0.44  | 77.83  |
|                         | CoPoP/<br>PHAD | 10    | 42  | 7,675   | 2 | 11,870  | 2.49  | 5.43 | 205-1 | 750 | 73.1  | 0.001 | 0.57  | 66.72  |
|                         | CoPoP/<br>PHAD | 2     | 42  | 548     | 2 | 1,259   | 5.61  | 4.81 | 205-1 | 750 | 39.2  | 0.223 | 0.22  | 21.73  |
| MA-0086-00 <sup>#</sup> | Alum           | 15000 | 42  | 54,377  | 4 | 82,917  | 0.49  | 4.25 | 233-2 | 750 | 45.0  | 0.187 | 0.26  | 124.69 |
|                         | Alum           | 1000  | 42  | 22,958  | 4 | 40,736  | 0.97  | 4.10 | 233-2 | 750 | 71.2  | 0.004 | 0.54  | 87.40  |
|                         | ISA720         | 200   | 42  | 100,369 | 4 | 128,635 | 4.45  | 4.16 | 233-2 | 750 | 100.0 | 0.001 | Inf*  | 155.30 |
|                         | ISA720         | 50    | 42  | 21,627  | 4 | 55,400  | 5.55  | 4.21 | 233-2 | 750 | 92.5  | 0.001 | 1.13  | 101.92 |
|                         | CoPoP/<br>PHAD | 200   | 42  | 21,353  | 4 | 46,708  | 6.20  | 4.95 | 233-2 | 750 | 90.2  | 0.001 | 1.01  | 93.58  |
|                         | CoPoP/<br>PHAD | 50    | 42  | 17,025  | 4 | 40,799  | 5.45  | 5.20 | 233-2 | 750 | 97.4  | 0.001 | 1.59  | 87.46  |
|                         | Alum           | 5000  | 42  | 46,210  | 4 | 78,563  | 0.51  | 4.20 | 233-2 | 750 | -15.7 | 0.738 | -0.06 | 121.37 |
|                         | Alum           | 15000 | 250 | 4,634   | 8 | 9,358   | 1.05  | 4.65 | 248-2 | 750 | 1.4   | 0.977 | 0.01  | 29.62  |
|                         | Alum           | 1000  | 250 | 8,913   | 8 | 11,507  | 1.14  | 4.53 | 248-2 | 750 | 46.8  | 0.142 | 0.27  | 32.85  |
|                         | CoPoP/<br>PHAD | 200   | 250 | 12,963  | 8 | 22,885  | 14.63 | 5.89 | 248-2 | 750 | -7.8  | 0.881 | -0.03 | 46.32  |
|                         | CoPoP/<br>PHAD | 50    | 250 | 15,201  | 8 | 34,405  | 6.83  | 4.93 | 248-2 | 750 | 66.0  | 0.008 | 0.47  | 56.79  |

Table entries show serum geometric mean (Geo Mean) in ELISA units (EU), IgG concentration, total ELISA units, IgG2-to-IgG1 ratio, antibody avidity IC50 (based on urea denaturation), standard membrane feeding assay (SMFA) test number, the transmission reducing activity (TRA) and the log-mean-ratio (LMR) the log10 of the ratio of the mean number of oocysts in the SMFA control to the mean number of oocysts in the test sample.

\*Inf = infinity

<sup>#</sup>Some immunizations in this study were done in duplicate at two sites

**Supplementary Table 2. Comparison between Pfs25 and Pfs230C1 with the combination of CoPoP/PHAD or ISA720**

| Adjuvant             | CoPoP/PHAD     | ISA720         | CoPoP/PHAD        | ISA720            |
|----------------------|----------------|----------------|-------------------|-------------------|
| Antigen              | Pfs25 (100 ng) | Pfs25 (100 ng) | Pfs230C1 (125 ng) | Pfs230C1 (125 ng) |
|                      | MA-0056        |                | MA-0068           |                   |
| Purified IgG 4 mg/ml | 122036         | 12139          | 64307.5           | 96922.7           |
|                      | SMFA-170_2     |                | SMFA-192          |                   |
| % inhibition         | 92.3           | -87.2          | 99.8              | 100               |

**Supplementary Table 3. SMFA #251 (rabbit)**

| Sample                   | IgG conc [mg/ml] | Oocyte Av. | % inhibition estimate | p-value |
|--------------------------|------------------|------------|-----------------------|---------|
| Rabbit #1                | 3.75             | 0.1        | 99.1                  | 0.001   |
| Rabbit #2                | 3.75             | 0.0        | 100                   | 0.001   |
| Rabbit #3                | 3.75             | 0.1        | 99.1                  | 0.001   |
| Rabbit #4                | 3.75             | 0.0        | 100                   | 0.001   |
| Control: Pre-immune sera | 3.75             | 5.3        | --                    | --      |

### <RStudio code>

The RStudio code were used to plot the data in **figure 5a**, showing x axis as IgG2-IgG1 ratio, y axis as percentage of transmission-reducing activity and z axis as Pgs230C1 IgG level, coding details could be found below:

```
install.packages("scatterplot3d", dependencies = TRUE)

library(scatterplot3d)

scatterplot3d(Data2[,1:3])

scatterplot3d(Data2[,1:3], angle = 40)

scatterplot3d(Data2[,1:3],
              main="3D Scatter Plot",
              xlab = "IgG subclass",
              ylab = "% TRA",
              zlab = "EU")

shapes = c(15, 16, 17)

shapes <- shapes[as.numeric(Data2$G)]

scatterplot3d(Data2[,1:3], pch = shapes)

colors <- c("#999999", "#0000FF", "#56B4E9")

colors <- colors[as.numeric(Data2$G)]

scatterplot3d(Data2[,1:3], pch = 16, color=colors)

scatterplot3d(Data2[,1:3], pch = 16, color = colors,
              grid=TRUE, box=FALSE)

addgrids3d(x, y=NULL, z=NULL, grid = TRUE,
           col.grid = "grey", lty.grid=par("lty"))

scatterplot3d(Data2[,1:3], pch = 16, type="h",
              color=colors)

s3d <- scatterplot3d(Data2[,1:3], pch = 16, color=colors)

legend(s3d$xyz.convert(7.5, 3, 4.5), legend = levels(Data2$G),
       col = c("#999999", "#E69F00", "#56B4E9"), pch = 16)
```

```

s3d <- scatterplot3d(Data2[,1:3], pch = 16, color=colors)
legend("right", legend = levels(Data2$G),
      col = c("#999999", "#E69F00", "#56B4E9"), pch = 18)

s3d <- scatterplot3d(Data2[,1:3], pch = shapes)
legend("bottom", legend = levels(Data2$G),
      pch = c(16, 17, 18),
      inset = -0.25, xpd = TRUE, horiz = TRUE)
s3d <- scatterplot3d(Data2[,1:3], pch = 16, color=colors)
legend("bottom", legend = levels(Data2$G),
      col = c("#blue", "#E69F00", "#56B4E9"), pch = 15,
      inset = -0.25, xpd = TRUE, horiz = TRUE)
s3d <- scatterplot3d(Data2[,1:3], pch = shapes, color=colors, cex.symbols=2.7,angle = 65, type="h")
legend("bottom", legend = levels(Data2$G),
      col = c("#999999", "#E69F00", "#56B4E9"),
      pch = c(15, 16, 17),
      inset = -0.25, xpd = TRUE, horiz = TRUE)
addgrids3d(Data2[, 1:3], grid = c("xy", "xz", "yz"))
library(addgrids3d)
source('~/.hubiC/Documents/R/function/addgrids3d.r')
addgrids3d(x, y=NULL, z=NULL, grid = TRUE,
          col.grid = "grey", lty.grid=par("lty"))

```
